# Supplementary material
Source: PubMed Central journal article supplement (PMC2659625)
Supplement: NIHMS95196-supplement-03.pdf [file NIHMS95196-supplement-03.pdf]

Table E1. Subject characteristics and cytokine responses

| Subject | Disease           | Age | Sex | Race | AG  | Dose*                   | Challenge | BAL<br>% recovery | Albumin<br>mg/ml | BAFF<br>pg/ml | IL-6<br>pg/ml | IL-13<br>pg/ml | IgA<br>µg/ml | IgE<br>ng/ml | sIgA<br>µg/ml |
|---------|-------------------|-----|-----|------|-----|-------------------------|-----------|-------------------|------------------|---------------|---------------|----------------|--------------|--------------|---------------|
| 1       | Allergic Asthma   | 20  | F   | Cauc | RW  | 0.03 <sup>a</sup> x 0.5 | SAL       | 44                | 0.07             | 0             | 4             | 0              | 8            | 1            | 33            |
|         |                   |     |     |      |     |                         | AG        | 41                | 0.08             | 0             | 11            | 0              | 7            | 1            | 23            |
|         |                   |     |     |      |     |                         | Serum     |                   | 30.21            | 776           | 8             | 0              | 1712         | 2000         | <0.4          |
| 2       | Allergic Asthma   | 25  | F   | AA   | RW  | 0.03 <sup>a</sup> x 25  | SAL       | 57                | 0.04             | 0             | 5             | 0              | 6            | 1            | 26            |
|         |                   |     |     |      |     |                         | AG        | 38                | 0.33             | 22            | 100           | 11             | 23           | 26           | 17            |
|         |                   |     |     |      |     |                         | Serum     |                   | 21.24            | 555           | 8             | 0              | 2024         | 1787         | <0.4          |
| 3       | Allergic Asthma   | 35  | M   | AA   | RW  | 5 x 0.1                 | SAL       | 48                | 0.03             | 0             | 5             | 0              | 6            | 35           | 23            |
|         |                   |     |     |      |     |                         | AG        | 42                | 3.36             | 270           | 2309          | 340            | 345          | 2            | 15            |
| 4       | Allergic Asthma   | 43  | F   | AA   | RW  | 5 x 0.1                 | SAL       | 63                | 0.10             | 0             | 31            | 0              | 15           | 7            | 46            |
|         |                   |     |     |      |     |                         | AG        | 58                | 0.09             | 0             | 12            | 0              | 7            | 7            | 19            |
|         |                   |     |     |      |     |                         | Serum     |                   | 43.21            | 1346          | 8             | 0              | 3449         | 3491         | <0.4          |
| 5       | Allergic Asthma   | 28  | M   | AA   | RW  | 5 x 0.1                 | SAL       | 35                | 0.01             | 0             | 1             | 0              | 5            | 1            | 20            |
|         |                   |     |     |      |     |                         | AG        | 41                | 1.96             | 73            | 1270          | 72             | 198          | 55           | 2             |
|         |                   |     |     |      |     |                         | Serum     |                   | 24.35            | 411           | 8             | 0              | 4470         | 1456         | <0.4          |
| 6       | Allergic Asthma   | 37  | M   | Cauc | DF  | 5 x 0.03                | SAL       | 31                | 0.03             | 0             | 2             | 0              | 4            | 1            | 18            |
|         |                   |     |     |      |     |                         | AG        | 16                | 0.21             | 0             | 18            | 0              | 22           | 4            | 14            |
|         |                   |     |     |      |     |                         | Serum     |                   | 38.29            | 847           | 8             | 0              | 4703         | 1328         | <0.4          |
| 7       | Allergic Rhinitis | 28  | F   | AA   | RW  | 5 x 2.5                 | SAL       | 63                | 0.02             | 0             | 1             | 0              | 7            | 3            | 34            |
|         |                   |     |     |      |     |                         | AG        | 79                | 2.13             | 202           | 1145          | 230            | 195          | 56           | 3             |
|         |                   |     |     |      |     |                         | Serum     |                   | 23.39            | 570           | 14            | 0              | 1851         | 496          | <0.4          |
| 8       | Allergic Asthma   | 27  | M   | AA   | DPT | 5 x 0.3                 | SAL       | 48                | 0.02             | 0             | 2             | 0              | 8            | 3            | 31            |
|         |                   |     |     |      |     |                         | AG        | 41                | 0.45             | 70            | 448           | 3              | 61           | 17           | 15            |
|         |                   |     |     |      |     |                         | Serum     |                   | 30.44            | 342           | 8             | 0              | 5248         | 1328         | <0.4          |
| 9       | Allergic Asthma   | 33  | M   | Cauc | DPT | 5 x 0.3                 | SAL       | 46                | 0.06             | 0             | 3             | 0              | 5            | 0            | 38            |
|         |                   |     |     |      |     |                         | AG        | 34                | 0.40             | 63            | 400           | 13             | 13           | 3            | 29            |
|         |                   |     |     |      |     |                         | Serum     |                   | 43.93            | 719           | 14            | 0              | 1178         | 523          | <0.4          |
| 10      | Allergic Asthma   | 35  | F   | Cauc | DPT | 5 x 0.06                | SAL       | 50                | 0.02             | 0             | 3             | 0              | 5            | 0            | 20            |
|         |                   |     |     |      |     |                         | AG        | 55                | 2.01             | 407           | 7459          | 85             | 329          | 52           | 14            |
|         |                   |     |     |      |     |                         | Serum     |                   | 27.89            | 1013          | 106           | 0              | 1740         | 333          | <0.4          |
| 11      | Allergic Rhinitis | 43  | F   | Cauc | DPT | 5 x 0.13                | SAL       | 51                | 0.08             | 0             | 14            | 0              | 2            | 0            | 9             |
|         |                   |     |     |      |     |                         | AG        | 44                | 0.28             | 0             | 76            | 13             | 7            | 2            | 9             |
|         |                   |     |     |      |     |                         | Serum     |                   | 34.82            | 1064          | 14            | 0              | 966          | 184          | <0.4          |
| 12      | Allergic Asthma   | 33  | M   | Cauc | DPT | 5 x 0.001               | SAL       | 54                | 0.05             | 0             | 8             | 0              | 11           | 1            | 44            |
|         |                   |     |     |      |     |                         | AG        | 48                | 0.04             | 0             | 10            | 0              | 10           | 1            | 36            |
|         |                   |     |     |      |     |                         | Serum     |                   | 25.11            | 642           | 0             | 0              | 4104         | 1328         | <0.4          |
| 13      | Allergic Asthma   | 33  | M   | AA   | RW  | 5 x 10                  | SAL       | 53                | 0.03             | 0             | 2             | 0              | 4            | 3            | 24            |
|         |                   |     |     |      |     |                         | AG        | 36                | 0.13             | 29            | 21            | 5              | 8            | 31           | 21            |
|         |                   |     |     |      |     |                         | Serum     |                   | 21.28            | 682           | 0             | 0              | 919          | 7192         | <0.4          |
| 14      | Allergic Rhinitis | 43  | F   | AA   | RW  | 5 x 10                  | SAL       | 48                | 0.03             | 0             | 4             | 0              | 4            | 0            | 23            |
|         |                   |     |     |      |     |                         | AG        | 52                | 0.34             | 44            | 18            | 0              | 19           | 9            | 29            |
|         |                   |     |     |      |     |                         | Serum     |                   | 27.35            | 675           | 21            | 0              | 1377         | 1019         | <0.4          |
| 15      | Allergic Asthma   | 18  | M   | AA   | RW  | 5 x 10                  | SAL       | 28                | 0.10             | 35            | 54            | 0              | 12           | 56           | 46            |
|         |                   |     |     |      |     |                         | AG        | 42                | 1.28             | 192           | 215           | 13             | 79           | 777          | 32            |
|         |                   |     |     |      |     |                         | Serum     |                   | 21.40            | 407           | 8             | 0              | 1690         | 20505        | <0.4          |
| 16      | Allergic Rhinitis | 42  | M   | AA   | RW  | 5 x 0.01                | SAL       | 50                | 0.05             | 0             | 15            | 0              | 7            | 1            | 37            |
|         |                   |     |     |      |     |                         | AG        | 46                | 0.50             | 73            | 77            | 37             | 71           | 17           | 51            |
|         |                   |     |     |      |     |                         | Serum     |                   | 24.51            | 597           | 8             | 0              | 3909         | 1212         | <0.4          |

Cauc, Caucasian; AA, African American; RW, Amb a1 (Antigen E); DF, Der f1; DPT, Der p1; SAL, Saline; AG, Antigen.

\*Dose, volume (ml) x concentration (µg/ml) of specific allergen; a, volume delivered by aerosol
